# Supplementary material for: More surprising differences between two closely similar compartmental ligand families and another dinuclear synthon to stabilize dinuclear–mononuclear cocrystals
Source: Royal Society of Chemistry journal article supplement (doi:10.1039/c3ce40569a), 2013-01-01
Supplement: c3ce40569a.pdf [file c3ce40569a.pdf]

## **Electronic Supplementary Information**

**For**

**More surprising difference between two closely similar compartmental ligand families and another dinuclear synthon to stabilize dinuclear-mononuclear cocrystals**

**Arpita Biswas, Leena Mandal, Suraj Mondal, C. Robert Lucas\* and Sasankasekhar Mohanta\***

**Table S1** Structural parameters (distances in Å and angles in °) in the coordination environment of the copper(II) centers in **1** and **2**

|                    | <b>1</b>   | <b>2</b>   |
|--------------------|------------|------------|
| Cu1–N1             | 1.964(2)   | 1.958(2)   |
| Cu1–N2             | 1.974(2)   | 1.971(2)   |
| Cu1–O1             | 1.9528(18) | 1.9585(17) |
| Cu1–O2             | 1.9376(17) | 1.9323(17) |
| N1–Cu1–O2          | 169.69(8)  | 169.72(8)  |
| O1–Cu1–N2          | 169.93(8)  | 169.61(8)  |
| O1–Cu1–N1          | 92.44(9)   | 93.06(8)   |
| O1–Cu1–O2          | 77.35(7)   | 76.81(7)   |
| O2–Cu1–N2          | 92.59(8)   | 92.83(8)   |
| N1–Cu1–N2          | 97.60(9)   | 97.27(9)   |
| $d_{\text{Cu}}^a$  | 0.019      | 0.023      |
| $d_{\text{N/O}}^a$ | 0.0068     | 0.0074     |

$d_{\text{Cu}}$  is the displacement of the copper center and  $d_{\text{N/O}}$  is the deviation of the constituent atoms from the corresponding least-squares N(imine)<sub>2</sub>O(phenoxo)<sub>2</sub> basal plane.

**Table S2** Structural parameters (distances in Å and angles in °) in the coordination environment of the copper(II) centers in **3** and **4**

|                    | <b>3</b> | <b>4</b>   |             | <b>3</b>   | <b>4</b>   |
|--------------------|----------|------------|-------------|------------|------------|
| Cu1–N1             | 1.907(3) | 1.913(2)   | O1–Cu1–N2   | 178.05(10) | 177.75(9)  |
| Cu1–N2             | 1.924(3) | 1.933(2)   | N1–Cu1–O2   | 178.19(11) | 178.19(10) |
| Cu1–O1             | 1.894(2) | 1.9019(19) | O1–Cu1–N1   | 96.18(10)  | 96.35(9)   |
| Cu1–O2             | 1.880(2) | 1.8847(19) | O1–Cu1–O2   | 82.85(9)   | 82.41(8)   |
|                    |          |            | O2–Cu1–N2   | 95.29(10)  | 95.48(9)   |
|                    |          |            | N1–Cu2–N2   | 85.70(11)  | 85.78(10)  |
| $d_{\text{Cu}}^a$  | 0.008    | 0.004      |             |            |            |
| $d_{\text{N/O}}^a$ | 0.0168   | 0.017      |             |            |            |
| Cu2–N3             | 1.949(3) | 1.953(3)   | O8–Cu2–N4   | 176.99(12) | 177.01(11) |
| Cu2–N4             | 1.940(3) | 1.949(3)   | N3–Cu2–O9   | 176.67(12) | 176.75(11) |
| Cu2–O8             | 1.911(2) | 1.917(2)   | O8–Cu2–N3   | 93.66(12)  | 93.61(11)  |
| Cu2–O9             | 1.907(3) | 1.911(2)   | O8–Cu2–O9   | 89.13(12)  | 89.13(10)  |
|                    |          |            | O9–Cu2–N4   | 93.83(12)  | 93.86(11)  |
|                    |          |            | N3–Cu2–N4   | 83.40(13)  | 83.40(12)  |
| $d_{\text{Cu}}^a$  | 0.010    | 0.014      |             |            |            |
| $d_{\text{N/O}}^a$ | 0.020    | 0.015      |             |            |            |
| Cu3–N5             | 1.936(3) | 1.945(3)   | O12–Cu3–N6  | 177.68(11) | 177.45(10) |
| Cu3–N6             | 1.943(3) | 1.948(3)   | N5–Cu3–O13  | 176.20(10) | 176.42(10) |
| Cu3–O12            | 1.897(2) | 1.901(2)   | O12–Cu3–N5  | 94.64(11)  | 94.46(10)  |
| Cu3–O13            | 1.890(2) | 1.896(2)   | O12–Cu3–O13 | 86.62(9)   | 86.65(9)   |
|                    |          |            | O13–Cu3–N6  | 94.51(11)  | 94.53(10)  |
|                    |          |            | N5–Cu3–N6   | 84.11(13)  | 84.23(12)  |
| $d_{\text{Cu}}^a$  | 0.046    | 0.047      |             |            |            |
| $d_{\text{N/O}}^a$ | 0.020    | 0.009      |             |            |            |

$^a d_{\text{Cu}}$  is the displacement of the copper center and  $d_{\text{N/O}}$  is the deviation of the constituent atoms from the corresponding least-squares N(imine)<sub>2</sub>O(phenoxo)<sub>2</sub> basal plane.

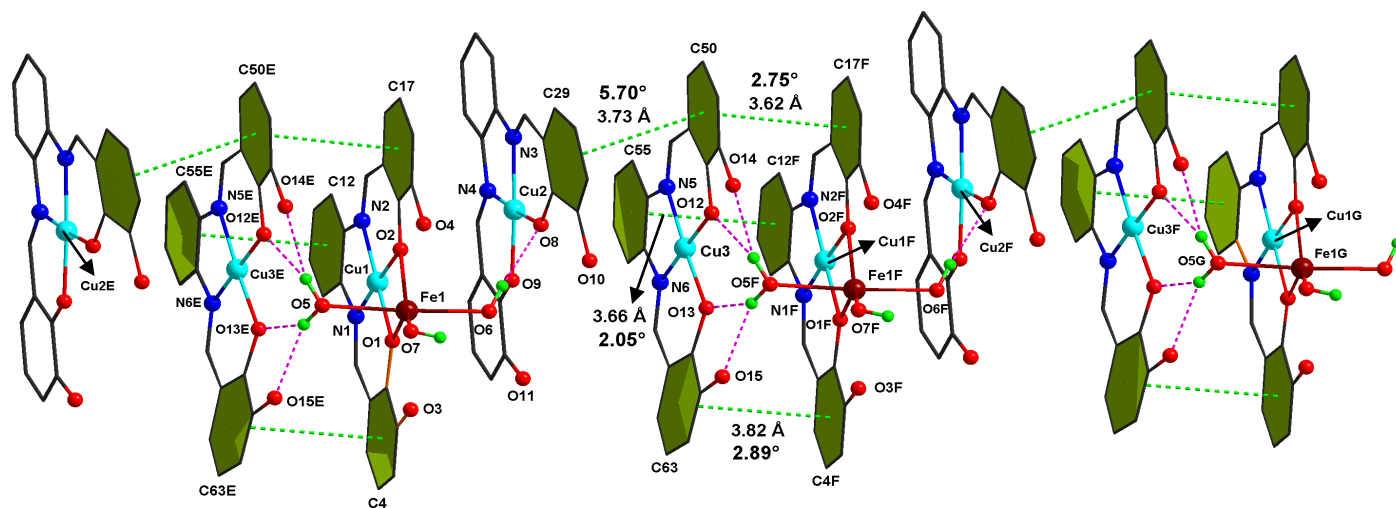

**Fig. S1** Perspective view of  $[\{\text{Cu}^{\text{II}}\text{L}^2\text{Fe}^{\text{II}}(\text{H}_2\text{O})(\text{MeOH})_2\}(\text{Cu}^{\text{II}}\text{L}^2)_2](\text{ClO}_4)_2 \cdot \text{MeOH}$  (**4**) showing hydrogen bonding and  $\pi \cdots \pi$  stacking interactions and one-dimensional self-assembly. Methyl groups of methoxy moieties, perchlorate anions and methanol as solvent of crystallization have been omitted. Only those hydrogen atoms are shown which participate in hydrogen bonding. The values in Å and ° are the centroid-to-centroid distances and dihedral angles between the aromatic rings responsible for  $\pi \cdots \pi$  stacking interactions. Symmetry codes: E,  $1+x, y, z$ ; F,  $-1+x, y, z$ ; G,  $-2+x, y, z$ .

The equations used for simulation of magnetic data of 1–4 are mentioned below:

|                                                                                                                                                                                                                               |                                                                                                                                                                                                                                |
|-------------------------------------------------------------------------------------------------------------------------------------------------------------------------------------------------------------------------------|--------------------------------------------------------------------------------------------------------------------------------------------------------------------------------------------------------------------------------|
| <b>Cu<sup>II</sup>Mn<sup>II</sup> (1):</b>                                                                                                                                                                                    | <b>Cu<sup>II</sup>Fe<sup>II</sup> (2):</b>                                                                                                                                                                                     |
| $\chi_M = \frac{\chi_D}{1 - 2zJ'\chi_D / N\beta^2 g^2}$ <p>where</p> $\chi_D = \frac{N\beta^2 g^2}{kT} \frac{10 + 28e^{6J/kT}}{5 + 7e^{6J/kT}} + TIP$                                                                         | $\chi_M = \frac{\chi_D}{1 - 2zJ'\chi_D / N\beta^2 g^2}$ <p>where</p> $\chi_D = \frac{N\beta^2 g^2}{4kT} \frac{10 + 35e^{5J/kT}}{2 + 3e^{5J/kT}} + TIP$                                                                         |
| <b>Cu<sup>II</sup>Mn<sup>II</sup>...2Cu<sup>II</sup> (3):</b>                                                                                                                                                                 | <b>Cu<sup>II</sup>Fe<sup>II</sup>...2Cu<sup>II</sup> (4):</b>                                                                                                                                                                  |
| $\chi_M = \frac{\chi_M^1}{1 - 2zJ'\chi_M^1 / N\beta^2 g^2}$ <p>where</p> $\chi_M^1 = \frac{7.997\chi_D T + 2\mu_{Cu}^2}{7.997T} + TIP$ <p>with</p> $\chi_D = \frac{N\beta^2 g^2}{kT} \frac{10 + 28e^{6J/kT}}{5 + 7e^{6J/kT}}$ | $\chi_M = \frac{\chi_M^1}{1 - 2zJ'\chi_M^1 / N\beta^2 g^2}$ <p>where</p> $\chi_M^1 = \frac{7.997\chi_D T + 2\mu_{Cu}^2}{7.997T} + TIP$ <p>with</p> $\chi_D = \frac{N\beta^2 g^2}{4kT} \frac{10 + 35e^{5J/kT}}{2 + 3e^{5J/kT}}$ |
